# Supplementary material for: Comparison of Primary Virus Isolation in Pulmonary Alveolar Macrophages and Four Different Continuous Cell Lines for Type 1 and Type 2 Porcine Reproductive and Respiratory Syndrome Virus
Source: MDPI journal article supplement (doi:10.3390/vaccines9060594), 2021-06-03
Supplement: s1 [file s1]

**Table S1.** Titration results for PRRSV1 on PAM, PK15<sup>Sn</sup>-CD163, PK15<sup>S10</sup>-CD163, MARC-145<sup>Sn</sup> and MARC-145.

| No. | Serum<br>sample number<br>sample | Sequence<br>availability<br>ence | Virus titers on .... cells (log <sub>10</sub> /mL) |                           |                            |                    |                     |
|-----|----------------------------------|----------------------------------|----------------------------------------------------|---------------------------|----------------------------|--------------------|---------------------|
|     |                                  |                                  | PAM                                                | PK15 <sup>Sn</sup> -CD163 | PK15 <sup>S10</sup> -CD163 | MARC <sup>Sn</sup> | MARC <sup>___</sup> |
| 1   | 18v195-1                         | full                             | 2.8                                                | 1.6                       | <1 <sup>b</sup>            | <1                 | <1                  |
| 2   | 18v195-2                         | na <sup>a</sup>                  | <1                                                 | <1                        | <1                         | <1                 | <1                  |
| 3   | 18v195-3                         | na                               | <1                                                 | <1                        | <1                         | <1                 | <1                  |
| 4   | 18v195-4                         | full                             | 2.3                                                | 1.0                       | 1.0                        | <1                 | <1                  |
| 5   | 18v195-5                         | na                               | <1                                                 | <1                        | <1                         | <1                 | <1                  |
| 6   | 18v195-6                         | na                               | <1                                                 | <1                        | <1                         | <1                 | <1                  |
| 7   | 18v195-7                         | full                             | 1.8                                                | <1                        | <1                         | <1                 | <1                  |
| 8   | 18v195-8                         | full                             | 3.6                                                | 2.1                       | <1                         | <1                 | <1                  |
| 9   | 18v195-9                         | na                               | <1                                                 | <1                        | <1                         | <1                 | <1                  |
| 10  | 19v13-1                          | full                             | 4.5                                                | 3.3                       | 3.0                        | 3.6                | 2.8                 |
| 11  | 19v13-2                          | na                               | <1                                                 | <1                        | <1                         | <1                 | <1                  |
| 12  | 19v13-3                          | full                             | 4.5                                                | 3.2                       | 2.3                        | <1                 | <1                  |
| 13  | 19v13-4                          | full                             | 2.6                                                | <1                        | <1                         | <1                 | <1                  |
| 14  | 19v13-5                          | na                               | <1                                                 | <1                        | <1                         | <1                 | <1                  |
| 15  | 19v13-6                          | partial                          | 2.9                                                | 1.0                       | 1.0                        | <1                 | <1                  |
| 16  | 19v13-7                          | full                             | 2.0                                                | <1                        | <1                         | <1                 | <1                  |
| 17  | 19v13-8                          | na                               | <1                                                 | <1                        | <1                         | <1                 | <1                  |
| 18  | 19v13-9                          | na                               | <1                                                 | <1                        | <1                         | <1                 | <1                  |
| 19  | 19v13-10                         | na                               | <1                                                 | <1                        | <1                         | <1                 | <1                  |
| 20  | 1901-1055                        | na                               | <1                                                 | <1                        | <1                         | <1                 | <1                  |
| 21  | 19v93-2                          | full                             | 2.3                                                | <1                        | 2.0                        | 2.0                | 2.1                 |
| 22  | 1901-1058                        | na                               | 2.0                                                | <1                        | <1                         | <1                 | <1                  |
| 23  | 1901-1100                        | na                               | <1                                                 | <1                        | <1                         | <1                 | <1                  |
| 24  | 19v93-5                          | full                             | 3.1                                                | 2.6                       | 2.3                        | <1                 | <1                  |
| 25  | 19v93-6                          | partial                          | 2.0                                                | 2.0                       | <1                         | <1                 | <1                  |
| 26  | 1901-1166                        | na                               | <1                                                 | 1.6                       | 1.6                        | <1                 | <1                  |
| 27  | 1901-1172                        | na                               | <1                                                 | <1                        | <1                         | <1                 | <1                  |
| 28  | 1902-1043                        | na                               | <1                                                 | <1                        | <1                         | <1                 | <1                  |
| 29  | 1902-1044                        | na                               | <1                                                 | <1                        | <1                         | <1                 | <1                  |
| 30  | 1902-1065                        | na                               | <1                                                 | <1                        | <1                         | <1                 | <1                  |
| 31  | 19v93-12                         | full                             | 1.1                                                | 1.0                       | 1.3                        | <1                 | <1                  |
| 32  | 19v93-13                         | full                             | <1                                                 | <1                        | <1                         | 1.8                | 1.1                 |
| 33  | 19v93-15                         | full                             | <1                                                 | 1.3                       | <1                         | 1.0                | 2.5                 |
| 34  | 19v93-17                         | full                             | 3.3                                                | 2.3                       | 1.5                        | <1                 | 1.1                 |
| 35  | 1904-1027                        | na                               | <1                                                 | <1                        | <1                         | <1                 | <1                  |
| 36  | 1904-1028                        | na                               | <1                                                 | <1                        | <1                         | <1                 | <1                  |
| 37  | 19v93-21                         | full                             | 1.3                                                | <1                        | <1                         | <1                 | <1                  |
| 38  | 19v93-22                         | full                             | 1.0                                                | 1.0                       | <1                         | <1                 | <1                  |
| 39  | 19v93-23                         | full                             | 2.8                                                | 3.3                       | 2.0                        | <1                 | 2.0                 |
| 40  | 19v105-930                       | na                               | <1                                                 | <1                        | <1                         | <1                 | <1                  |
| 41  | 19v105-931                       | na                               | <1                                                 | <1                        | <1                         | <1                 | <1                  |
| 42  | 19v105-933                       | full                             | 2.0                                                | <1                        | <1                         | <1                 | <1                  |
| 43  | 19v105-950                       | full                             | 4.5                                                | 3.3                       | 3.0                        | <1                 | <1                  |
| 44  | 19v105-951                       | full                             | 4.5                                                | 4.5                       | 3.0                        | 2.0                | 2.8                 |
| 45  | 19v105-952                       | full                             | 4.5                                                | 3.3                       | 2.6                        | <1                 | <1                  |
| 46  | 19v105-966                       | full                             | 1.5                                                | <1                        | <1                         | <1                 | <1                  |
| 47  | 19v105-967                       | na                               | <1                                                 | <1                        | <1                         | <1                 | <1                  |

<sup>a</sup>na: not available; <sup>b</sup><1 : detection limit.

**Table S2.** Titration results for PRRSV2 on PAM, PK15<sup>Sn</sup>-CD163, PK15<sup>S10</sup>-CD163, MARC-145<sup>Sn</sup> and MARC-145.

| No. | Serum Sample | Sequence | Virus titers on ... cells (log <sub>10</sub> /mL) |                           |                            |                    |      |
|-----|--------------|----------|---------------------------------------------------|---------------------------|----------------------------|--------------------|------|
|     |              |          | PAM                                               | PK15 <sup>Sn</sup> -CD163 | PK15 <sup>S10</sup> -CD163 | MARC <sup>Sn</sup> | MARC |
| 1   | 1949752      | partial  | 2.6                                               | <1 <sup>a</sup>           | <1                         | <1                 | <1   |
| 2   | 1953024      | full     | 4.5                                               | 2.0                       | <1                         | 2.0                | <1   |
| 3   | 1966316      | full     | 2.3                                               | 1.3                       | 1.6                        | <1                 | <1   |
| 4   | 1982260      | full     | 3.6                                               | <1                        | <1                         | <1                 | <1   |
| 5   | 1982261      | partial  | 2.7                                               | <1                        | <1                         | <1                 | <1   |
| 6   | 1982353      | full     | 4.5                                               | 4.5                       | 3.3                        | 1.6                | 2.0  |
| 7   | 1982354      | full     | 4.5                                               | 4.5                       | 3.6                        | 2.6                | 2.0  |
| 8   | 1985928      | full     | 4.6                                               | 4.5                       | 4.5                        | 3.0                | 3.0  |
| 9   | 1989513      | full     | 3.0                                               | <1                        | <1                         | <1                 | <1   |
| 10  | 2010362      | full     | <1                                                | <1                        | <1                         | <1                 | <1   |
| 11  | 2018114      | partial  | <1                                                | <1                        | <1                         | <1                 | <1   |
| 12  | 2018119      | full     | <1                                                | 2.0                       | <1                         | <1                 | <1   |
| 13  | 2019713      | full     | <1                                                | <1                        | <1                         | <1                 | <1   |
| 14  | 2029069      | full     | 3.3                                               | 2.8                       | 3.0                        | 2.0                | <1   |
| 15  | 2035290      | full     | 2.6                                               | 1.3                       | 1.0                        | 2.6                | 2.0  |
| 16  | 2048380      | full     | 3.3                                               | <1                        | 1.3                        | 2.3                | <1   |
| 17  | 2050887      | full     | 2.0                                               | 1                         | <1                         | 2.3                | 2.3  |
| 18  | 2053682      | full     | 3.3                                               | 3.6                       | 3.6                        | 2.3                | 3.3  |
| 19  | 2057423      | full     | 2.0                                               | <1                        | <1                         | <1                 | <1   |
| 20  | 2067408      | full     | <1                                                | 1.0                       | 1.0                        | 3.0                | 4.5  |
| 21  | 2073979      | full     | 3.6                                               | 2.6                       | 2.6                        | 2.6                | 3.0  |
| 22  | 2078279      | full     | 1                                                 | <1                        | <1                         | 1.6                | 1.0  |
| 23  | 2081331      | partial  | 3.4                                               | 2.1                       | 2.0                        | 2.6                | 3.5  |
| 24  | 2087622      | full     | 1.8                                               | <1                        | 1.0                        | <1                 | <1   |
| 25  | 2092399      | full     | 3.7                                               | 2.3                       | 2.0                        | 2.0                | 2.8  |
| 26  | 2101687      | full     | 3.6                                               | 2.3                       | 1.3                        | <1                 | <1   |
| 27  | 2104407      | full     | 4.5                                               | 4.5                       | 3.6                        | <1                 | <1   |
| 28  | 2108625      | full     | 3.0                                               | 2.3                       | <1                         | 2.0                | 2.0  |
| 29  | 2109640      | full     | 3.1                                               | 3.3                       | 2.3                        | 3.0                | 3.0  |
| 30  | 2154774      | full     | 4.6                                               | 4.5                       | 3.0                        | 3.0                | 2.8  |

<sup>a</sup> <1 : detection limit.

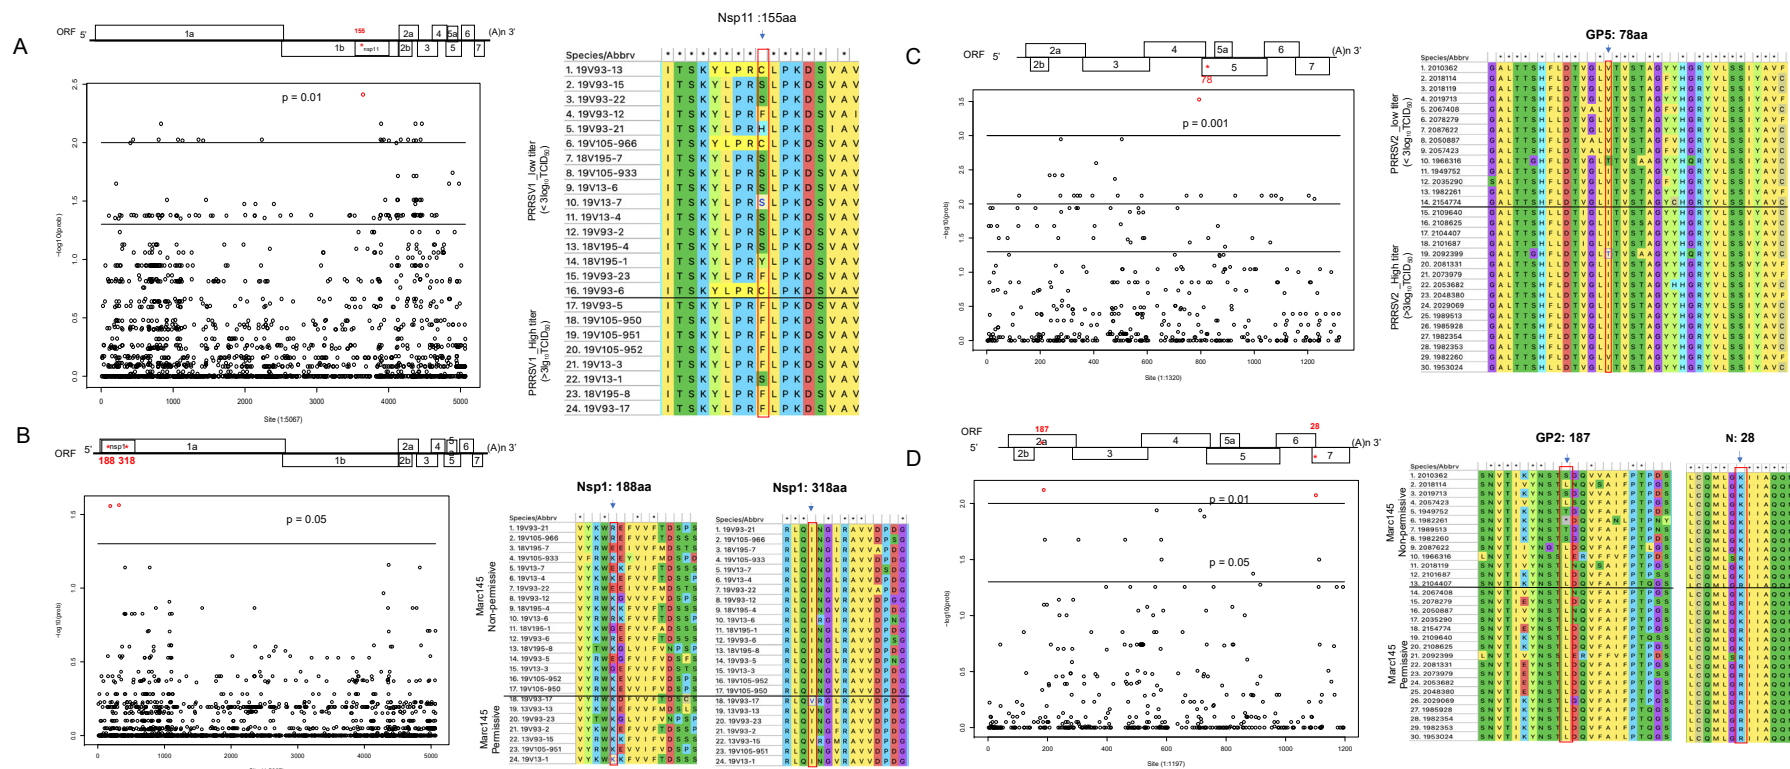

**Figure S1.** Results of GWAS shows potential residues linked to the cell tropism both for PRRSV1 and PRRSV2. A. PRRSV1 sequence comparison between the isolates with high vs. low titers (on PAM). B. PRRSV1 sequence comparison between MARC-145 permissive isolates and non-permissive isolates. C. PRRSV2 sequence comparison between the isolates with high vs. low titers (on PAM). D. PRRSV2 sequence comparison between MARC-145 permissive and non-permissive isolates. Residues showed a significant difference ( $p < 0.05$  and/or  $p < 0.01$ ) between the compared groups were indicated with the position in the corresponding viral protein. The GWAS analysis was performed with the custom R script (<https://github.com/itrus/GWAS-fasta>) [40]. Sequence alignment for the identified residues were performed and analyzed with MEGA6.
